# Supplementary material for: Identification of High-Risk Atypical Meningiomas According to Semantic and Radiomic Features
Source: PubMed Central journal article supplement (PMC7599676; doi:10.3390/cancers12102942), 2020-10-12
Supplement: cancers-12-02942-s001.pdf [file cancers-12-02942-s001.pdf]

# Identification of High-Risk Atypical Meningiomas According to Semantic and Radiomic Features

Darius Kalasauskas, Andrea Kronfeld, Mirjam Renovanz, Elena Kurz, Petra Leukel, Harald Krenzlin, Marc A. Brockmann, Clemens J. Sommer, Florian Ringel and Naureen Keric

**Table S1.** Description of radiomic and semantic features used in tumor analysis.

| <b>Radiomic characteristics</b>    |                                                                                     |
|------------------------------------|-------------------------------------------------------------------------------------|
| Mean                               | Mean voxel intensity value                                                          |
| Median                             | Median voxel intensity value                                                        |
| Minimum                            | Minimal voxel intensity value                                                       |
| Skewness                           | Measure of the assymetry of a probability distribution of the voxel intensity value |
| Spherical Disproportion            | The difference of the tumor shape to the sphere with a similar volume               |
| Cluster Prominence                 | Sensitive to the areas of similar intensity                                         |
| Difference Entropy                 | Complexity of the pattern                                                           |
| Inverse Difference Normalized      | Sensitive to the homogeneity of the tumor                                           |
| Run Length Non-uniformity          | Sensitive to heterogeneity                                                          |
| Short Run Low Gray-Level Emphasis  | Measures the heterogeneity sensitive to low intensity pattern                       |
| High Intensity Large Area Emphasis | Sensitive to flat zones with high intensity voxels (e.g. hemorrhage)                |
| Low Intensity Large Area Emphasis  | Sensitive to flat zones with low intensity voxels (e.g. necrosis)                   |
| Low Intensity Small Area Emphasis  | Sensitive to small flat zones with low intensity voxels                             |
| <b>Semantic characteristics</b>    |                                                                                     |
| Intratumoral heterogeneity         | Heterogeneity throughout the tumor                                                  |
| Multifocality                      | Non-contiguous growth of tumor                                                      |
| Midline shift                      | Shift of brain past midline                                                         |
| Sinus invasion                     | Presence of venous sinus invasion                                                   |
| Necrosis / Hemorrhage              | Presence of necrosis or hemorrhage                                                  |
| Mass effect                        | Presence of brain shift due to the tumor                                            |
| Cystic component                   | Fluid filled cysts within the tumor                                                 |
| Bone invasion                      | Appearance of tumor invading the skull                                              |
| Hyperostosis                       | Bony overgrowth adjacent to the tumor                                               |
| Spiculation                        | Irregularities of tumor shape and border                                            |
| Edema                              | Brain swelling due to the tumor                                                     |

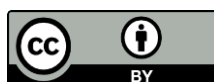

© 2020 by the authors. Licensee MDPI, Basel, Switzerland. This article is an open access article distributed under the terms and conditions of the Creative Commons Attribution (CC BY) license (<http://creativecommons.org/licenses/by/4.0/>).
